# Supplementary material for: Estimation of Multiyear Consequences for Abortion Access in Georgia Under a Law Limiting Abortion to Early Pregnancy
Source: PubMed Central journal article supplement (PMC9989903; doi:10.1001/jamanetworkopen.2023.1598), 2023-03-06
Supplement: jamanetwopen-e231598-s001.pdf [file jamanetwopen-e231598-s001.pdf]

## Supplementary Online Content

Redd SK, Mosley EA, Narasimhan S, et al. Estimation of multiyear consequences for abortion access in Georgia under a law limiting abortion to early pregnancy. *JAMA Netw Open*. 2023;6(3):e231598. doi:10.1001/jamanetworkopen.2023.1598

**eTable 1.** Number and Percentage of Abortions Provided in Georgia, Stratified by Weeks' Gestation and Patient Race, Age, and Educational Level

**eTable 2.** Number and Percentage of Abortions Provided in Georgia, Stratified by Weeks' Gestation and Patient Age

**eTable 3.** Number and Percentage of Abortions Provided in Georgia, Stratified by Weeks' Gestation and Patient Educational Level

**eFigure 1.** Percentage of Abortions Provided in Georgia, Stratified by Weeks' Gestation

**eFigure 2.** Percentage of Abortions Provided in Georgia <6 Weeks from Last Menstrual Period, Stratified by Patient Race

**eFigure 3.** Percentage of Abortions Provided in Georgia <6 Weeks from Last Menstrual Period, Stratified by Patient Age

**eFigure 4.** Percentage of Abortions Provided in Georgia <6 Weeks from Last Menstrual Period, Stratified by Patient Educational Level

This supplementary material has been provided by the authors to give readers additional information about their work.

**eTable 1.** Number and Percentage of Abortions Provided in Georgia, Stratified by Weeks' Gestation and Patient Race, Age, and Educational Level

| Year                         | Race  | Abortions <6 Weeks in GA<br>No. (%) | Abortions ≥6 Weeks in GA<br>No. (%) | Total Abortions in GA | X <sup>2</sup> ,<br>p-value  |
|------------------------------|-------|-------------------------------------|-------------------------------------|-----------------------|------------------------------|
| 2007                         | Black | 1,346 (6.9%)                        | 18,229 (93.1%)                      | 19,575                | 9.03,<br>0.003               |
|                              | White | 970 (7.8%)                          | 11,519 (92.2%)                      | 12,489                |                              |
| 2008                         | Black | 885 (4.2%)                          | 20,111 (95.8%)                      | 20,996                | 103.09,<br><0.001            |
|                              | White | 696 (6.9%)                          | 9,359 (93.1%)                       | 10,055                |                              |
| 2009                         | Black | 950 (4.9%)                          | 18,353 (95.1%)                      | 19,303                | 194.11,<br><0.001            |
|                              | White | 804 (9.3%)                          | 7,848 (90.7%)                       | 8,652                 |                              |
| 2010                         | Black | 1,139 (5.6%)                        | 19,245 (94.4%)                      | 20,384                | 225.11,<br><0.001            |
|                              | White | 891 (10.6%)                         | 7,549 (89.4%)                       | 8,440                 |                              |
| 2011                         | Black | 1,091 (6.1%)                        | 16,712 (93.9%)                      | 17,803                | 141.05,<br><0.001            |
|                              | White | 812 (10.3%)                         | 7,037 (89.7%)                       | 7,849                 |                              |
| 2012                         | Black | 1,553 (8.7%)                        | 16,265 (91.3%)                      | 17,818                | 173.63,<br><0.001            |
|                              | White | 1,125 (14.1%)                       | 6,833 (85.9%)                       | 7,958                 |                              |
| 2013                         | Black | 1,454 (8.0%)                        | 16,703 (92.0%)                      | 18,157                | 189.70,<br><0.001            |
|                              | White | 1,077 (13.5%)                       | 6,916 (86.5%)                       | 7,993                 |                              |
| 2014                         | Black | 1,228 (6.9%)                        | 16,675 (93.1%)                      | 17,903                | 151.63,<br><0.001            |
|                              | White | 898 (11.4%)                         | 6,946 (88.6%)                       | 7,844                 |                              |
| 2015                         | Black | 1,935 (10.5%)                       | 16,544 (89.5%)                      | 18,479                | 33.29,<br><0.001             |
|                              | White | 1,006 (12.9%)                       | 6,774 (87.1%)                       | 7,780                 |                              |
| 2016                         | Black | 1,920 (9.2%)                        | 18,944 (90.8%)                      | 20,864                | 256.93,<br><0.001            |
|                              | White | 1,266 (15.8%)                       | 6,745 (84.2%)                       | 8,011                 |                              |
| 2017                         | Black | 1,966 (10.1%)                       | 17,457 (89.9%)                      | 19,423                | 225.62,<br><0.001            |
|                              | White | 1,293 (16.7%)                       | 6,460 (83.3%)                       | 7,753                 |                              |
| <b>2007–2017<br/>Average</b> | Black | 1,406 (7.3%)                        | 17,749 (92.7%)                      | 19,155                | <b>126.20,<br/>&lt;0.001</b> |
|                              | White | 985 (11.4%)                         | 7,635 (88.6%)                       | 8,620                 |                              |
| <b>2016–2017<br/>Average</b> | Black | 1,943 (9.6%)                        | 18,201 (90.4%)                      | 20,144                | <b>241.91,<br/>&lt;0.001</b> |
|                              | White | 1,280 (16.2%)                       | 6,603 (83.8%)                       | 7,882                 |                              |

**Induced Termination of Pregnancy (ITOP) Data, 2016–2017**

**eTable 2.** Number and Percentage of Abortions Provided in Georgia, Stratified by Weeks' Gestation and Patient Age

| Year | Age         | Abortions <6 Weeks in GA<br>No. (%) | Abortions ≥6 Weeks in GA<br>No. (%) | Total Abortions in GA | X <sup>2</sup> ,<br>p-value |
|------|-------------|-------------------------------------|-------------------------------------|-----------------------|-----------------------------|
| 2007 | <20 years   | 270 (5.2%)                          | 4,952 (94.8%)                       | 5,222                 | 57.44,<br><0.001            |
|      | 20-29 years | 1,367 (7.2%)                        | 17,708 (92.8%)                      | 19,075                |                             |
|      | 30-39 years | 709 (8.6%)                          | 7,512 (91.4%)                       | 8,221                 |                             |
|      | ≥40 years   | 69 (6.8%)                           | 948 (93.2%)                         | 1,017                 |                             |
| 2008 | <20 years   | 197 (3.6%)                          | 5,267 (96.4%)                       | 5,464                 | 44.64,<br><0.001            |
|      | 20-29 years | 1,110 (5.4%)                        | 19,358 (94.6%)                      | 20,468                |                             |
|      | 30-39 years | 551 (6.0%)                          | 8,571 (94.0%)                       | 9,122                 |                             |
|      | ≥40 years   | 68 (6.5%)                           | 972 (93.5%)                         | 1,040                 |                             |
| 2009 | <20 years   | 205 (4.2%)                          | 4,714 (95.8%)                       | 4,919                 | 58.55,<br><0.001            |
|      | 20-29 years | 1,285 (6.9%)                        | 17,464 (93.1%)                      | 18,749                |                             |
|      | 30-39 years | 604 (6.9%)                          | 8,112 (93.1%)                       | 8,716                 |                             |
|      | ≥40 years   | 91 (8.7%)                           | 954 (91.3%)                         | 1,045                 |                             |
| 2010 | <20 years   | 247 (5.1%)                          | 4,558 (94.9%)                       | 4,805                 | 43.03,<br><0.001            |
|      | 20-29 years | 1,502 (7.6%)                        | 18,211 (92.4%)                      | 19,713                |                             |
|      | 30-39 years | 696 (7.5%)                          | 8,552 (92.5%)                       | 9,248                 |                             |
|      | ≥40 years   | 101 (9.3%)                          | 988 (90.7%)                         | 1,089                 |                             |
| 2011 | <20 years   | 235 (5.4%)                          | 4,132 (94.6%)                       | 4,367                 | 69.67,<br><0.001            |
|      | 20-29 years | 1,552 (8.4%)                        | 17,030 (91.6%)                      | 18,582                |                             |
|      | 30-39 years | 788 (8.8%)                          | 8,119 (91.2%)                       | 8,907                 |                             |
|      | ≥40 years   | 127 (11.7%)                         | 954 (88.3%)                         | 1,081                 |                             |
| 2012 | <20 years   | 307 (8.0%)                          | 3,546 (92.0%)                       | 3,853                 | 54.38,<br><0.001            |
|      | 20-29 years | 1,893 (10.5%)                       | 16,065 (89.5%)                      | 17,958                |                             |
|      | 30-39 years | 1,054 (12.2%)                       | 7,604 (87.8%)                       | 8,658                 |                             |
|      | ≥40 years   | 147 (12.6%)                         | 1,019 (87.4%)                       | 1,166                 |                             |
| 2013 | <20 years   | 243 (7.2%)                          | 3,138 (92.8%)                       | 3,381                 | 49.94,<br><0.001            |
|      | 20-29 years | 1,711 (9.7%)                        | 15,942 (90.3%)                      | 17,653                |                             |
|      | 30-39 years | 933 (10.7%)                         | 7,778 (89.3%)                       | 8,711                 |                             |
|      | ≥40 years   | 149 (13.3%)                         | 970 (86.7%)                         | 1,119                 |                             |
| 2014 | <20 years   | 184 (5.9%)                          | 2,913 (94.1%)                       | 3,097                 | 77.80,<br><0.001            |
|      | 20-29 years | 1,364 (7.8%)                        | 16,194 (92.2%)                      | 17,558                |                             |
|      | 30-39 years | 845 (10.0%)                         | 7,582 (90.0%)                       | 8,427                 |                             |
|      | ≥40 years   | 129 (11.6%)                         | 980 (88.4%)                         | 1,109                 |                             |
| 2015 | <20 years   | 297 (10.3%)                         | 2,585 (89.7%)                       | 2,882                 | 30.68,<br><0.001            |
|      | 20-29 years | 1,989 (10.8%)                       | 16,355 (89.2%)                      | 18,344                |                             |
|      | 30-39 years | 1,129 (12.9%)                       | 7,622 (87.1%)                       | 8,751                 |                             |
|      | ≥40 years   | 144 (12.8%)                         | 979 (87.2%)                         | 1,123                 |                             |

|                              |             |               |                |        |                             |
|------------------------------|-------------|---------------|----------------|--------|-----------------------------|
| 2016                         | <20 years   | 285 (9.4%)    | 2,749 (90.6%)  | 3,034  | 28.36,<br><0.001            |
|                              | 20-29 years | 2,166 (10.8%) | 17,935 (89.2%) | 20,101 |                             |
|                              | 30-39 years | 1,199 (12.2%) | 8,652 (87.8%)  | 9,851  |                             |
|                              | ≥40 years   | 149 (13.4%)   | 963 (86.6%)    | 1,112  |                             |
| 2017                         | <20 years   | 236 (8.8%)    | 2,457 (91.2%)  | 2,693  | 63.96,<br><0.001            |
|                              | 20-29 years | 2,218 (11.7%) | 16,670 (88.3%) | 18,888 |                             |
|                              | 30-39 years | 1,269 (13.3%) | 8,254 (86.7%)  | 9,523  |                             |
|                              | ≥40 years   | 186 (16.5%)   | 944 (83.5%)    | 1,130  |                             |
| <b>2007–2017<br/>Average</b> | <20 years   | 246 (6.2%)    | 3,728 (93.8%)  | 3,974  | <b>56.99,<br/>&lt;0.001</b> |
|                              | 20-29 years | 1,651 (8.8%)  | 17,176 (91.2%) | 18,826 |                             |
|                              | 30-39 years | 889 (10.0%)   | 8,033 (90.0%)  | 8,921  |                             |
|                              | ≥40 years   | 124 (11.3%)   | 970 (88.7%)    | 1,094  |                             |
| <b>2016–2017<br/>Average</b> | <20 years   | 261 (9.1%)    | 2,603 (90.9%)  | 2,864  | <b>44.29,<br/>&lt;0.001</b> |
|                              | 20-29 years | 2,192 (11.2%) | 17,303 (88.8%) | 19,495 |                             |
|                              | 30-39 years | 1,234 (12.7%) | 8,453 (87.3%)  | 9,687  |                             |
|                              | ≥40 years   | 168 (14.9%)   | 954 (85.1%)    | 1,121  |                             |

**Induced Termination of Pregnancy (ITOP) Data, 2007–2017**

**eTable 3.** Number and Percentage of Abortions Provided in Georgia, Stratified by Weeks' Gestation and Patient Educational Level

| Year | Age                    | Abortions <6 Weeks in GA<br>No. (%) | Abortions ≥6 Weeks in GA<br>No. (%) | Total Abortions in GA | X <sup>2</sup> ,<br>p-value |
|------|------------------------|-------------------------------------|-------------------------------------|-----------------------|-----------------------------|
| 2007 | Less than HS grad      | 354 (6.9%)                          | 4,780 (93.1%)                       | 5,134                 | 2.89,<br>0.24               |
|      | HS grad / GED          | 844 (6.9%)                          | 11,353 (93.1%)                      | 12,197                |                             |
|      | Some college or higher | 1,068 (7.4%)                        | 13,354 (92.6%)                      | 14,422                |                             |
| 2008 | Less than HS grad      | 171 (3.8%)                          | 4,383 (96.2%)                       | 4,554                 | 75.42,<br><0.001            |
|      | HS grad / GED          | 846 (6.9%)                          | 11,474 (93.1%)                      | 12,320                |                             |
|      | Some college or higher | 708 (5.0%)                          | 13,348 (95.0%)                      | 14,056                |                             |
| 2009 | Less than HS grad      | 218 (5.4%)                          | 3,785 (94.6%)                       | 4,003                 | 43.59,<br><0.001            |
|      | HS grad / GED          | 922 (7.4%)                          | 11,609 (92.6%)                      | 12,531                |                             |
|      | Some college or higher | 790 (5.5%)                          | 13,519 (94.5%)                      | 14,309                |                             |
| 2010 | Less than HS grad      | 183 (3.8%)                          | 4,663 (96.2%)                       | 4,846                 | 79.55,<br><0.001            |
|      | HS grad / GED          | 399 (4.1%)                          | 9,217 (95.9%)                       | 9,616                 |                             |
|      | Some college or higher | 962 (6.3%)                          | 14,286 (93.7%)                      | 15,248                |                             |
| 2011 | Less than HS grad      | 136 (3.5%)                          | 3,763 (96.5%)                       | 3,899                 | 53.13,<br><0.001            |
|      | HS grad / GED          | 338 (4.2%)                          | 7,695 (95.8%)                       | 8,033                 |                             |
|      | Some college or higher | 825 (5.9%)                          | 13,156 (94.1%)                      | 13,981                |                             |
| 2012 | Less than HS grad      | 202 (5.9%)                          | 3,250 (94.1%)                       | 3,452                 | 74.86,<br><0.001            |
|      | HS grad / GED          | 442 (5.9%)                          | 6,997 (94.1%)                       | 7,439                 |                             |
|      | Some college or higher | 1,214 (8.8%)                        | 12,510 (91.2%)                      | 13,724                |                             |
| 2013 | Less than HS grad      | 236 (7.1%)                          | 3,084 (92.9%)                       | 3,320                 | 106.84,<br><0.001           |
|      | HS grad / GED          | 519 (6.3%)                          | 7,734 (93.7%)                       | 8,253                 |                             |
|      | Some college or higher | 1,467 (10.1%)                       | 13,086 (89.9%)                      | 14,553                |                             |
| 2014 | Less than HS grad      | 311 (7.3%)                          | 3,928 (92.7%)                       | 4,239                 | 46.83,<br><0.001            |

|                   |                        |               |                |        |                   |
|-------------------|------------------------|---------------|----------------|--------|-------------------|
|                   | HS grad / GED          | 553 (6.5%)    | 7,906 (93.5%)  | 8,459  |                   |
|                   | Some college or higher | 1,372 (9.0%)  | 13,919 (91.0%) | 15,291 |                   |
| 2015              | Less than HS grad      | 512 (11.4%)   | 3,973 (88.6%)  | 4,485  | 71.53,<br><0.001  |
|                   | HS grad / GED          | 940 (9.3%)    | 9,134 (90.7%)  | 10,074 |                   |
|                   | Some college or higher | 2,104 (12.7%) | 14,419 (87.3%) | 16,523 |                   |
| 2016              | Less than HS grad      | 412 (9.2%)    | 4,069 (90.8%)  | 4,481  | 106.05,<br><0.001 |
|                   | HS grad / GED          | 1,061 (9.3%)  | 10,361 (90.7%) | 11,422 |                   |
|                   | Some college or higher | 2,322 (12.8%) | 15,847 (87.2%) | 18,169 |                   |
| 2017              | LT HS grad             | 372 (9.2%)    | 3,670 (90.8%)  | 4,042  | 156.57,<br><0.001 |
|                   | HS grad / GED          | 1,068 (9.9%)  | 9,761 (90.1%)  | 10,829 |                   |
|                   | Some college or higher | 2,467 (14.2%) | 14,867 (85.8%) | 17,334 |                   |
| 2007–2017 Average | LT HS grad             | 282 (6.7%)    | 3,941 (93.3%)  | 4,223  | 45.85,<br><0.001  |
|                   | HS grad / GED          | 721 (7.1%)    | 9,386 (92.9%)  | 10,107 |                   |
|                   | Some college or higher | 1,391 (9.1%)  | 13,846 (90.9%) | 15,237 |                   |
| 2016–2017 Average | LT HS grad             | 392 (9.2%)    | 3,870 (90.8%)  | 4,262  | 130.29,<br><0.001 |
|                   | HS grad / GED          | 1,065 (9.6%)  | 10,061 (90.4%) | 11,126 |                   |
|                   | Some college or higher | 2,395 (13.5%) | 15,357 (86.5%) | 17,752 |                   |

GED = general education development test; HS = high school; LT = less than

### Induced Termination of Pregnancy (ITOP) Data, 2007–2017

**eFigure 1.** Percentage of Abortions Provided in Georgia, Stratified by Weeks' Gestation

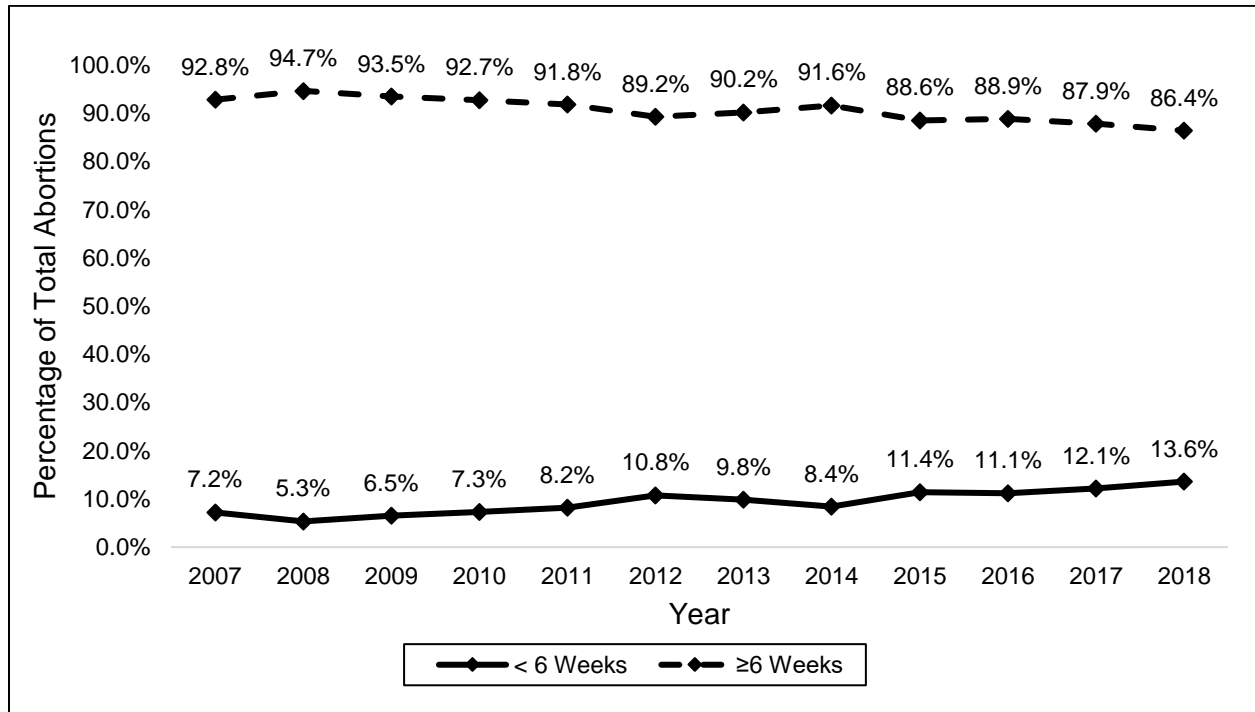

**Induced Termination of Pregnancy (ITOP) Data, 2007–2017**

**eFigure 2.** Percentage of Abortions Provided in Georgia <6 Weeks from Last Menstrual Period, Stratified by Patient Race

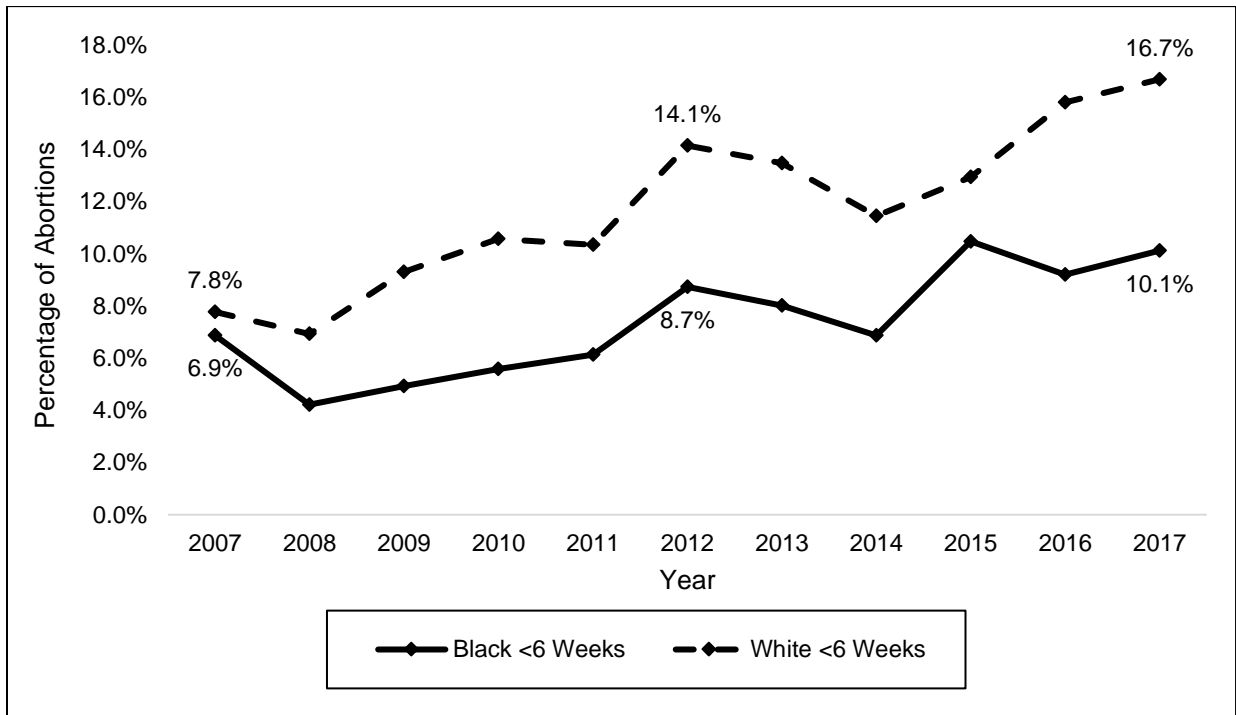

**Induced Termination of Pregnancy (ITOP) Data, 2007–2017**



**eFigure 3.** Percentage of Abortions Provided in Georgia <6 Weeks from Last Menstrual Period, Stratified by Patient Age

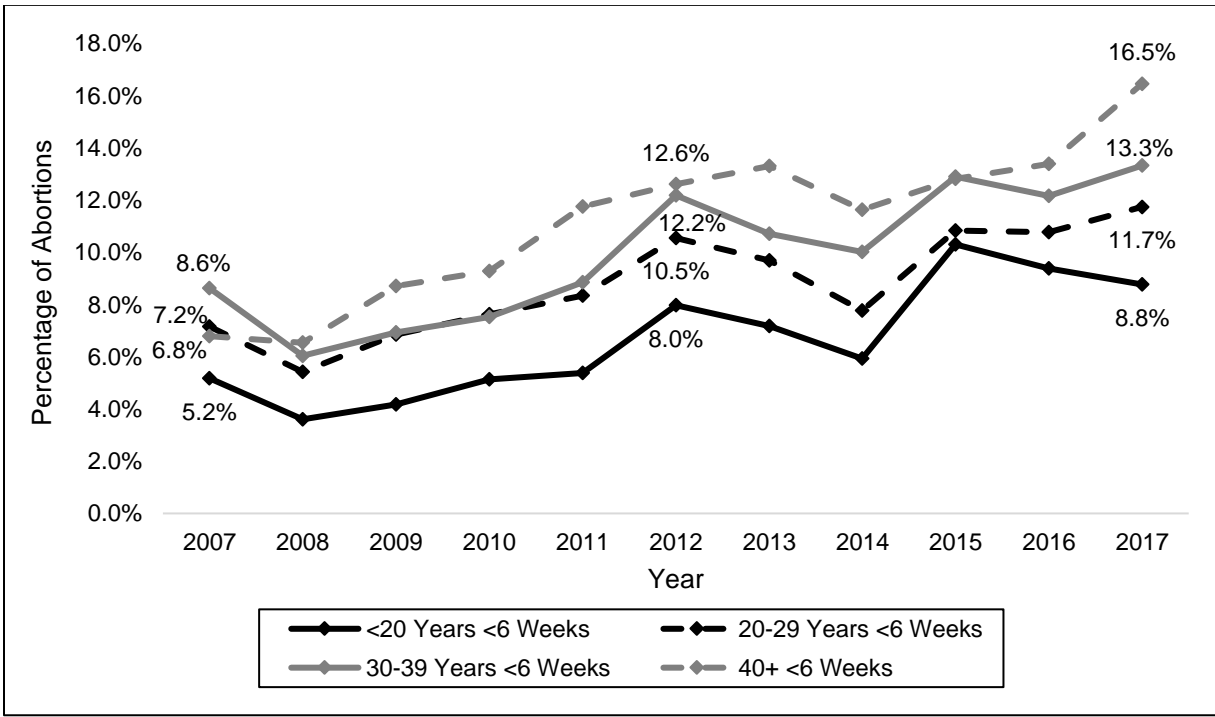

**Induced Termination of Pregnancy (ITOP) Data, 2007–2017**

**eFigure 4.** Percentage of Abortions Provided in Georgia <6 Weeks from Last Menstrual Period, Stratified by Patient Educational Level

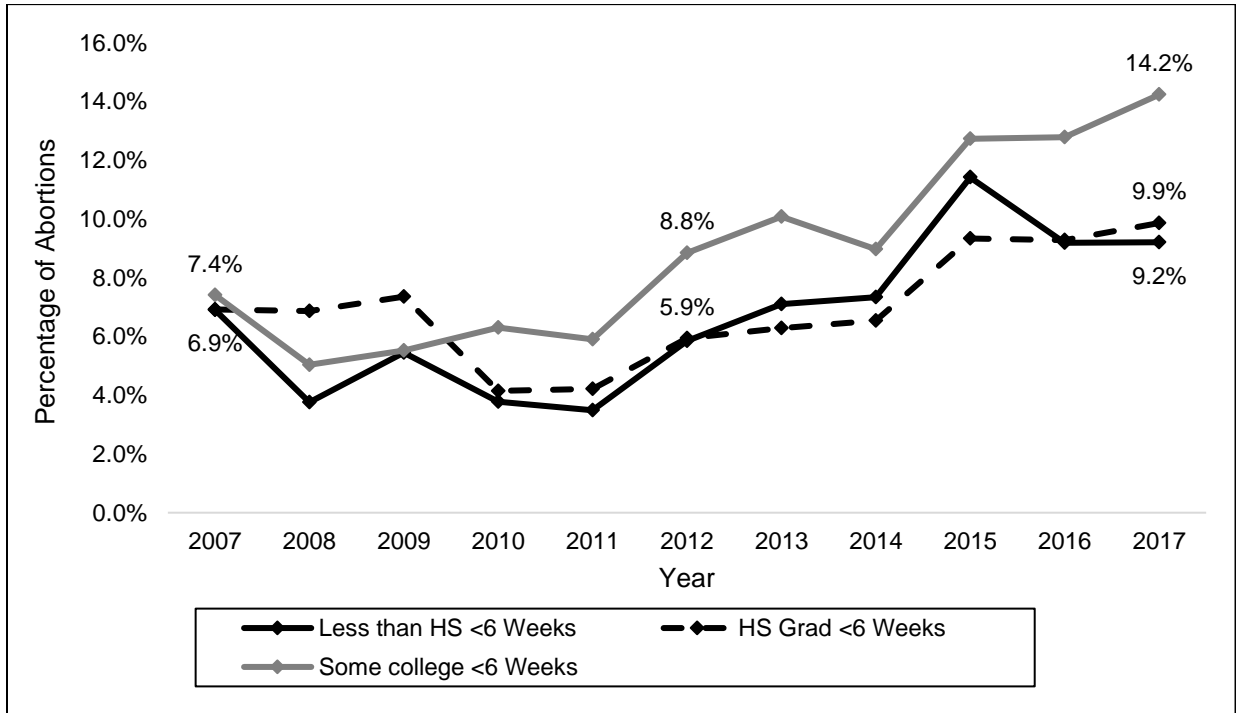

**Induced Termination of Pregnancy (ITOP) Data, 2007–2017**
