# Supplementary material for: Estimation of Multiyear Consequences for Abortion Access in Georgia Under a Law Limiting Abortion to Early Pregnancy
Source: PubMed Central journal article supplement (PMC9989903; doi:10.1001/jamanetworkopen.2023.1598), 2023-03-06
Supplement: jamanetwopen-e231598-s002.pdf [file jamanetwopen-e231598-s002.pdf]

## Data Sharing Statement

Redd. Estimation of Multiyear Consequences for Abortion Access in Georgia Under a Law Limiting Abortion to Early Pregnancy. *JAMA Netw Open*. Published March 06, 2023.  
doi:10.1001/jamanetworkopen.2023.1598

### Data

**Data available:** No

### Additional Information

**Explanation for why data not available:** This study used data made available via a data request to the Georgia Department of Public Health that the author does not have permission to share. Requests to access the data should be directed to the Georgia Department of Public Health.
